# Supplementary material
Source: HighWire-hosted journal article supplement (https://jech.bmj.com/content/73/1/65)
Supplement: inline-supplementary-material-5 [file inline-supplementary-material-5.pdf]

**Appendix supplementary table 3.** Changes over time in standardized SF-36 subscale scores in crude models according to gender

|                   | <b>PF</b><br>β | p      | <b>RP</b><br>β | p    | <b>BP</b><br>β | p      | <b>GH</b><br>β | p      | <b>VT</b><br>β | p      | <b>SF</b><br>β | p     | <b>RE</b><br>β | p    | <b>MH</b><br>β | p      |
|-------------------|----------------|--------|----------------|------|----------------|--------|----------------|--------|----------------|--------|----------------|-------|----------------|------|----------------|--------|
| <i>Male</i>       |                |        |                |      |                |        |                |        |                |        |                |       |                |      |                |        |
| Year              | <b>-0.04</b>   | <.0001 | -0.01          | 0.09 | <b>-0.01</b>   | 0.02   | <b>-0.03</b>   | <.0001 | <b>-0.03</b>   | <.0001 | <b>-0.02</b>   | 0.001 | <b>-0.01</b>   | 0.04 | -0.01          | 0.13   |
| Year <sup>2</sup> | <b>0.002</b>   | <.0001 | 0.0001         | 0.65 | -0.0003        | 0.20   | 0.0002         | 0.30   | 0.0003         | 0.16   | 0.0004         | 0.12  | <b>0.001</b>   | 0.03 | <b>-0.001</b>  | <.0001 |
| <i>Female</i>     |                |        |                |      |                |        |                |        |                |        |                |       |                |      |                |        |
| Year              | <b>-0.03</b>   | <.0001 | -0.01          | 0.36 | <b>-0.02</b>   | <.0001 | <b>-0.02</b>   | <.0001 | <b>-0.04</b>   | <.0001 | <b>-0.01</b>   | 0.002 | -0.01          | 0.32 | <b>-0.02</b>   | 0.0004 |
| Year <sup>2</sup> | <b>0.001</b>   | <.0001 | -0.0003        | 0.29 | 0.0002         | 0.37   | 0.0002         | 0.29   | <b>0.001</b>   | <.0001 | 0.0003         | 0.19  | 0.000004       | 0.99 | 0.0001         | 0.73   |

RP and RE were studied only in active people aged between 25 and 64 years old. Results in bold are statistically significant with a 5% threshold.
